# Supplementary material for: MacGyvered Multiproperty Materials Using Nanocarbon and Jam: A Spectroscopic, Electromagnetic, and Rheological Investigation
Source: MDPI journal article supplement (doi:10.3390/jfb13010005), 2022-01-10
Supplement: s1 [file s1]

# MacGyvered Multiproperty Materials Using Nanocarbon and Jam: A Spectroscopic, Electromagnetic and Rheological Investigation

Antonino Cataldo <sup>1,2,3,\*†</sup>, Matteo La Pietra <sup>3,†</sup>, Leonardo Zappelli <sup>2</sup>, Davide Mencarelli <sup>2</sup>, Luca Pierantoni <sup>2</sup> and Stefano Bellucci <sup>3</sup>

## Scanning electron microscopy (SEM)

The most representative SEM micrographs of the surface of JAM, JAM-MWCNT and JAM-GNP nanocomposites are shown in Figures S1–S5.

The micrograph in Figure S1. shows the morphology of JAM hydrogel, which is characterized by an amorphous structure and a smooth and thickened surface.

The 0.05% CNT/jam composite is shown in the micrograph in Figure S2.

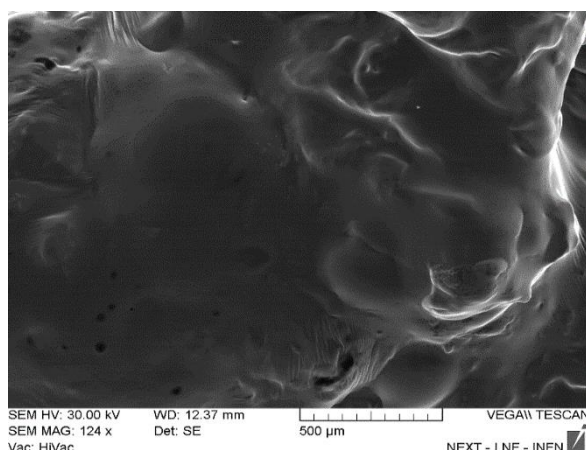

**Figure S1.** SEM micrograph of pure matrix.

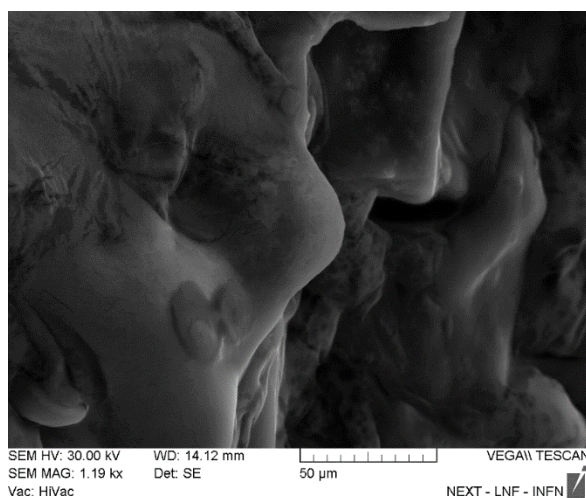

**Figure S2.** SEM micrograph of 0.05%w/w CNT /jam composite.

Adding a small quantity of filler to JAM matrix does not make substantial changes to the starting structure. However, the appearance of small lumps on the surface can be noted. The 2.5% CNT/jam composite is shown in the micrograph in Figure S3.

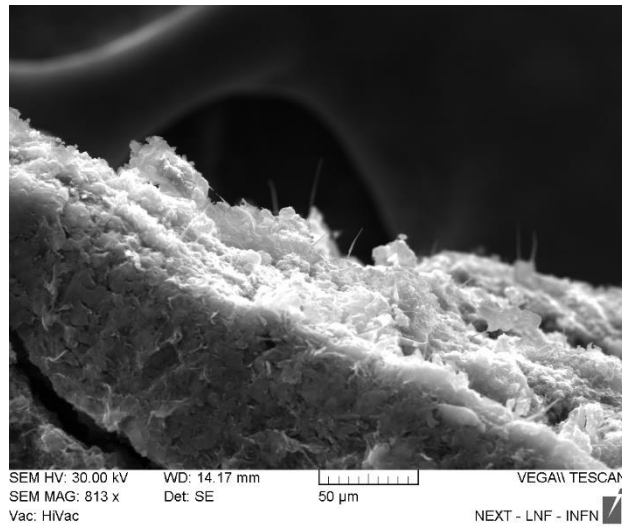

**Figure S3.** SEM micrograph of 2.5%<sub>w/w</sub> CNT/jam composite.

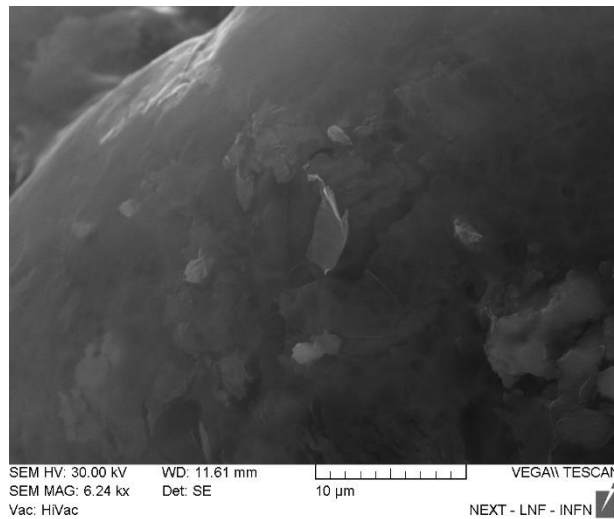

**Figure S4.** SEM micrograph of GNP/jam composite, 1.5%<sub>w/w</sub>.

A greater quantity of filler into the JAM matrix makes a radical change of the starting structure: the previously smooth surface is characterized by a high roughness. This is probably due to the exceeded of percolation threshold, which led to a significant change of the starting structure. The 0.05% GNP/jam nanocomposite is shown in the micrograph in Figure S5.

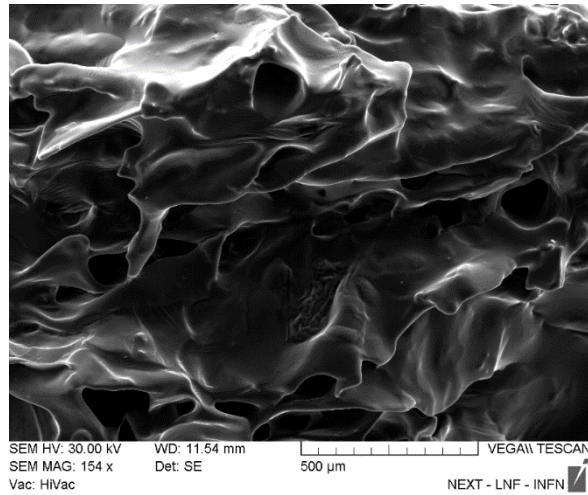

**Figure S5.** SEM micrograph of GNP/jam composite 0.05%w/w.

It is possible to observe a structure characterized by a jagged surface.

The 1.5% GNP/jam nanocomposite is shown in the micrograph in Figure S4.

The surface has a high roughness, this modification of the base structure is probably due to exceeded of the percolation threshold.

Furthermore, in addition to the changing in the surface morphology, SEM characterization reveals a low degree of agglomeration of the filler in the matrix.

### Impedance measurements

The accuracy of MFIA 5 MHz Impedance Analyzer (Zurich Instruments) in the range observed is extremely high. As it is possible checked from the diagrams, the errors in the module of impedance is around 0.05-0.1%; the errors in the phase of impedance is at maximum 100mdeg.

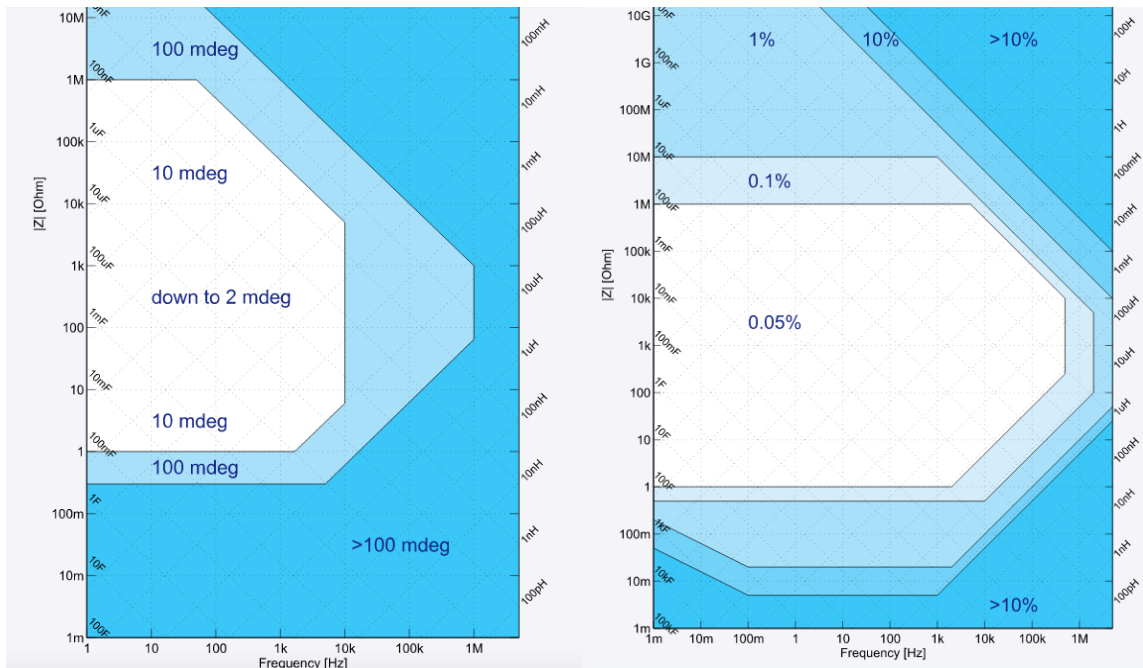

**Figure S6.** Errors chart of MFIA 5 MHz Impedance Analyzer.

**Table S1.** R2 values of fitting using different lumped circuits on CNT/jam nanocomposite specimens.

|                          | jam      |                 | CNT 0.05% |                 | CNT 0.25% |                 | CNT 0.5% |                 | CNT 0.75% |                 | CNT 1%   |                 | CNT 1.5% |                 |
|--------------------------|----------|-----------------|-----------|-----------------|-----------|-----------------|----------|-----------------|-----------|-----------------|----------|-----------------|----------|-----------------|
|                          | R2  Z    | R2 $\varphi(Z)$ | R2  Z     | R2 $\varphi(Z)$ | R2  Z     | R2 $\varphi(Z)$ | R2  Z    | R2 $\varphi(Z)$ | R2  Z     | R2 $\varphi(Z)$ | R2  Z    | R2 $\varphi(Z)$ | R2  Z    | R2 $\varphi(Z)$ |
| <b>R(RC)</b>             | 0.997075 | 0.980132        | 0.989371  | 0.937861        | 0.989888  | 0.935752        | 0.985852 | 0.924949        | 0.979513  | 0.90973         | 0.983092 | 0.935087        | 0.730619 | -0.19632        |
| <b>R(RC)<sub>2</sub></b> | 0.999841 | 0.990138        | 0.998709  | 0.982644        | 0.999237  | 0.9882          | 0.998902 | 0.986296        | 0.99749   | 0.976657        | 0.998169 | 0.982846        | 0.960127 | 0.632818        |
| <b>R(RC)<sub>3</sub></b> | 0.999986 | 0.997699        | 0.999875  | 0.997289        | 0.999908  | 0.997848        | 0.999866 | 0.997203        | 0.999634  | 0.994561        | 0.999703 | 0.994937        | 0.991622 | 0.88711         |
| <b>R(RC)<sub>4</sub></b> | 0.999998 | 0.999397        | 0.999978  | 0.999452        | 0.999976  | 0.999399        | 0.999972 | 0.999233        | 0.999912  | 0.998275        | 0.99993  | 0.998093        | 0.99806  | 0.968475        |

**Table S2.** R2 values of fitting using different lumped circuits on GNP/jam nanocomposite specimens.

|                          | jam      |                 | GNP 0.05% |                 | GNP 0.25% |                 | GNP 0.5% |                 | GNP 0.75% |                 | GNP 1%   |                 | GNP 1.5% |                 |
|--------------------------|----------|-----------------|-----------|-----------------|-----------|-----------------|----------|-----------------|-----------|-----------------|----------|-----------------|----------|-----------------|
|                          | R2  Z    | R2 $\varphi(Z)$ | R2  Z     | R2 $\varphi(Z)$ | R2  Z     | R2 $\varphi(Z)$ | R2  Z    | R2 $\varphi(Z)$ | R2  Z     | R2 $\varphi(Z)$ | R2  Z    | R2 $\varphi(Z)$ | R2  Z    | R2 $\varphi(Z)$ |
| <b>R(RC)</b>             | 0.997075 | 0.980132        | 0.998046  | 0.956655        | 0.986395  | 0.921644        | 0.980356 | 0.828983        | 0.977398  | 0.69123         | 0.963798 | 0.348026        | 0.930038 | 0.256005        |
| <b>R(RC)<sub>2</sub></b> | 0.999841 | 0.990138        | 0.999903  | 0.992687        | 0.998057  | 0.971937        | 0.996041 | 0.898227        | 0.995083  | 0.797699        | 0.99185  | 0.585033        | 0.98204  | 0.457222        |
| <b>R(RC)<sub>3</sub></b> | 0.999986 | 0.997699        | 0.999983  | 0.998632        | 0.999421  | 0.984857        | 0.999082 | 0.959127        | 0.998899  | 0.929733        | 0.998146 | 0.831893        | 0.99686  | 0.807729        |
| <b>R(RC)<sub>4</sub></b> | 0.999998 | 0.999397        | 0.999988  | 0.999529        | 0.999861  | 0.996541        | 0.999835 | 0.988633        | 0.99978   | 0.977066        | 0.999479 | 0.94829         | 0.999406 | 0.948438        |

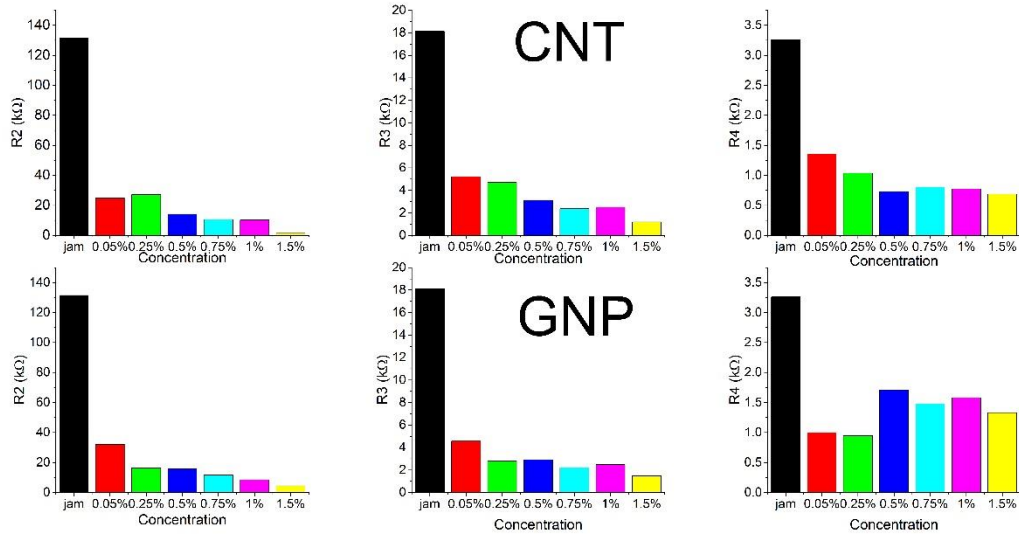

**Figure S7.** Best fitting results of resistances for CNT and GNP jam nanocomposite, (concentration 0% black, 0.05% red, 0.25% green, 0.5% blue, 0.75% cyano, 1% magenta, 1.5% yellow).

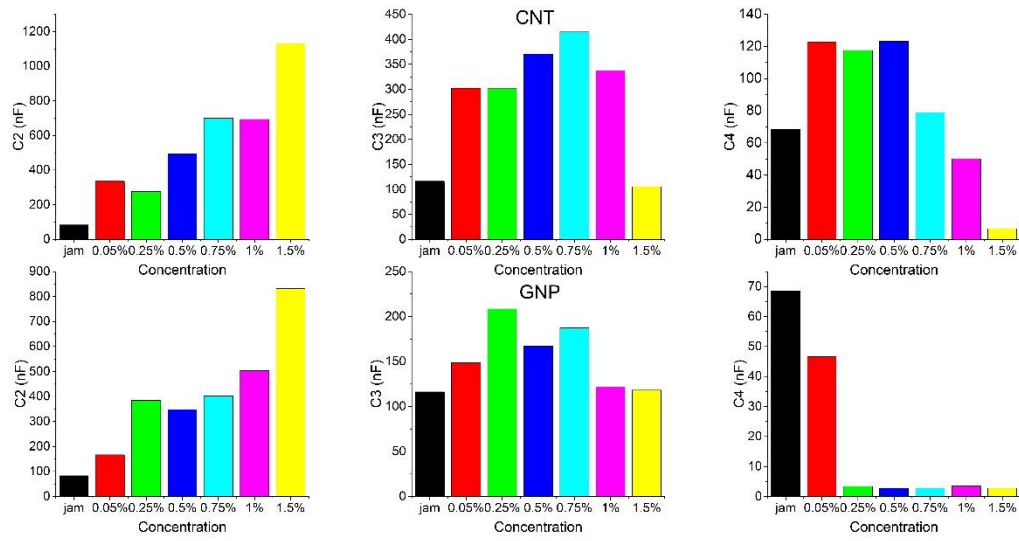

**Figure S8.** Best fitting results of capacitances for CNT and GNP jam nanocomposite, (concentration 0% black, 0.05% red, 0.25% green, 0.5% blue, 0.75% cyano, 1% magenta, 1.5% yellow).

---

## Rheological measurements

**Table S3.** Yield zone for CNT/jam nanocomposite.

|          | <i>LVE region limit (1/s)</i> | <i>Flow point (1/s)</i> |
|----------|-------------------------------|-------------------------|
| Jam      | 0.046                         | 0.336                   |
| CNT 0.05 | 0.039                         | 0.317                   |
| CNT 0.5  | 0.016                         | 0.247                   |
| CNT 0.75 | 0.018                         | 0.144                   |
| CNT 1    | 0.016                         | 0.212                   |
| CNT 1.5  | 0.011                         | 0.356                   |
| CNT 2.5  | 0.0082                        | 0.476                   |

**Table S4.** Yield zone for GNP/jam nanocomposite.

|          | <i>LVE region limit (1/s)</i> | <i>Flow point (1/s)</i> |
|----------|-------------------------------|-------------------------|
| Jam      | 0.046                         | 0.336                   |
| GNP 0.05 | 0.0034                        | 0.178                   |
| GNP 0.5  | 0.0033                        | 0.275                   |
| GNP 0.8  | 0.0024                        | 0.149                   |
| GNP 1    | 0.0010                        | 0.174                   |
| GNP 1.5  | 0.0017                        | 0.092                   |
